# Supplementary material for: Sphingomyelin-Based Nanosystems (SNs) for the Development of Anticancer miRNA Therapeutics
Source: PubMed Central journal article supplement (PMC7076701; doi:10.3390/pharmaceutics12020189), 2020-02-22
Supplement: pharmaceutics-12-00189-s001.pdf [file pharmaceutics-12-00189-s001.pdf]

# Supplementary Materials: Sphingomyelin-Based Nanosystems (SNs) for the Development of Anticancer miRNA Therapeutics

Surasa Nagachinta, Belen Lopez Bouzo, Abi Judit Vázquez-Ríos and Rafael López and María de la Fuente

**Table S1.** Physicochemical properties of Lipid complexes (miRNA-ST and miRNA-DOTAP).

| Lipid Complexes | Mass ratio ( <i>w/w</i> ) <sup>a</sup><br>miRNA:Cationic Lipid | Size (nm) | PDI <sup>b</sup> | ζ-Potential (mV) |
|-----------------|----------------------------------------------------------------|-----------|------------------|------------------|
| miRNA-ST        | 1:1                                                            | 466 ± 91  | 0.4              | -9 ± 4           |
|                 | 1:5                                                            | 76 ± 86   | 0.7              | +17 ± 4          |
|                 | 1:10                                                           | 158 ± 96  | 0.6              | +28 ± 6          |
|                 | 1:15                                                           | 189 ± 54  | 0.3              | +29 ± 4          |
|                 | 1:20                                                           | 164 ± 45  | 0.3              | +31 ± 3          |
| miRNA-DOTAP     | 1:1                                                            | 15 ± 18   | 0.7              | -10 ± 4          |
|                 | 1:5                                                            | 68 ± 73   | 0.7              | +6 ± 7           |
|                 | 1:10                                                           | 46 ± 34   | 0.4              | +20 ± 7          |
|                 | 1:15                                                           | 83 ± 16   | 0.3              | +32 ± 3          |
|                 | 1:20                                                           | 123 ± 80  | 0.5              | +32 ± 3          |

Data presented as mean ± standard deviation ( $n = 3$ ), <sup>a</sup> miRNA was maintained constant (10 µg per formulation), <sup>b</sup> PDI: polydispersity index.

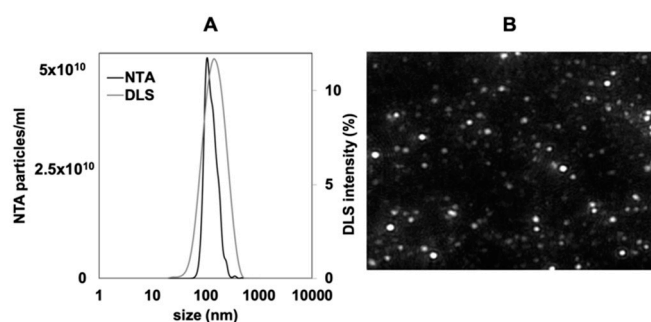

**Figure S1.** Characterization of SNs. (A) Size distribution graph measured from nanoparticle tracking analysis (NTA) and dynamic light scattering (DLS) and (B) video frame acquired by NTA.

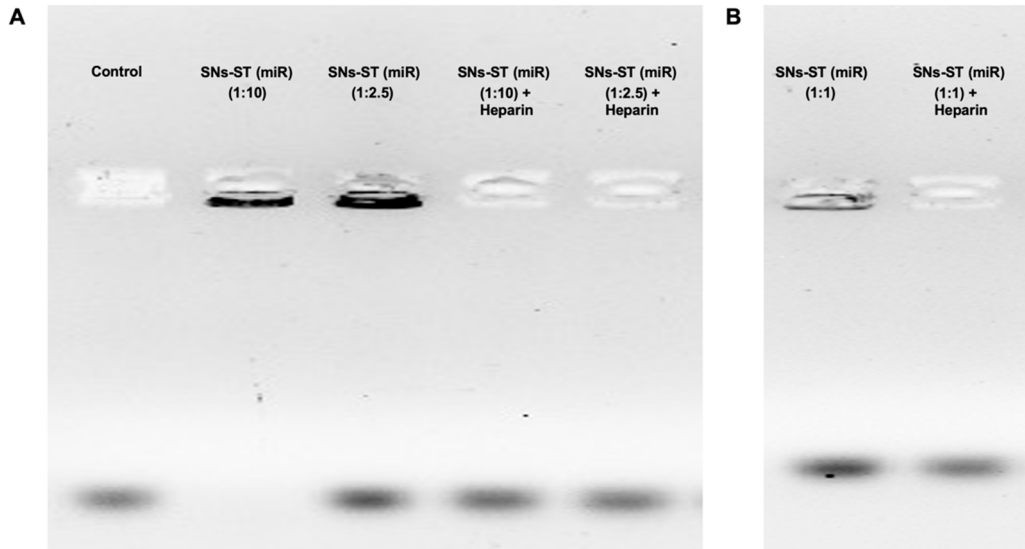

**Figure S2.** Electrophoresis of SNs-ST (miR) in different ratios of miRNA:ST (A) (1:10 and 1:2.5) and (B) (1:1) with or without heparin, control miRNA 0.5  $\mu$ g (agarose 1% 100 V, 40 min).

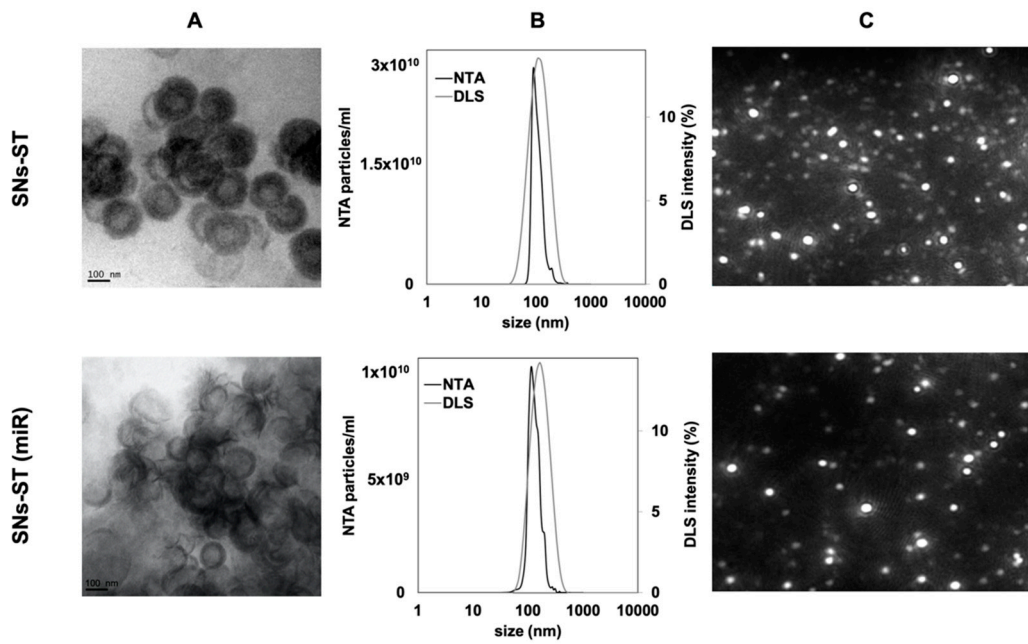

**Figure S3.** Characterization of SNs-ST and SNs-ST (miR). (A) Transmission electron microscopy (TEM) images. (B) Size distribution graph measured from nanoparticle tracking analysis (NTA) and dynamic light scattering (DLS), and (C) video frame acquired by NTA.

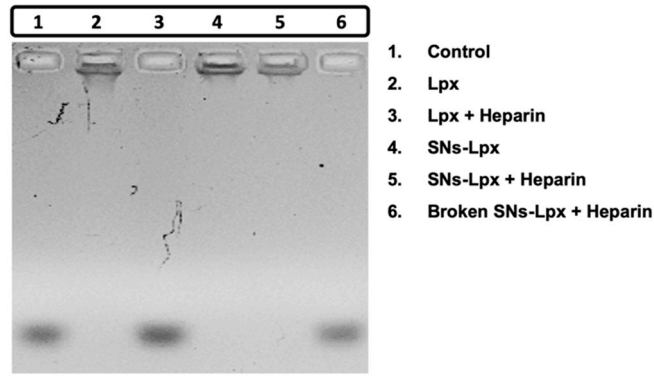

**Figure S4.** Electrophoresis of Lpx and SNs-Lpx. A displacement experiment upon incubation with a 25-fold excess of heparin (*w/w*) for 2 h at 37 °C allowed the migration of the associated miRNA. Experiment was carried in agarose gel 1% 100 Volts, 40 min (control miRNA 0.5 µg).

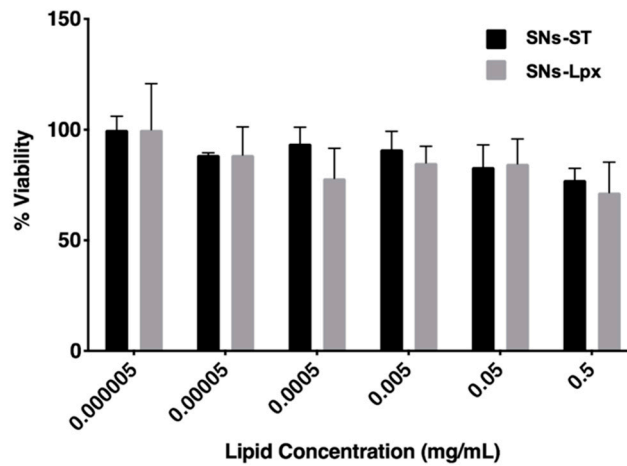

**Figure S5.** Cellular viability of SW480 cells after incubation with increased concentrations of SNs-ST and SNs-Lpx (24 h at 37 °C).

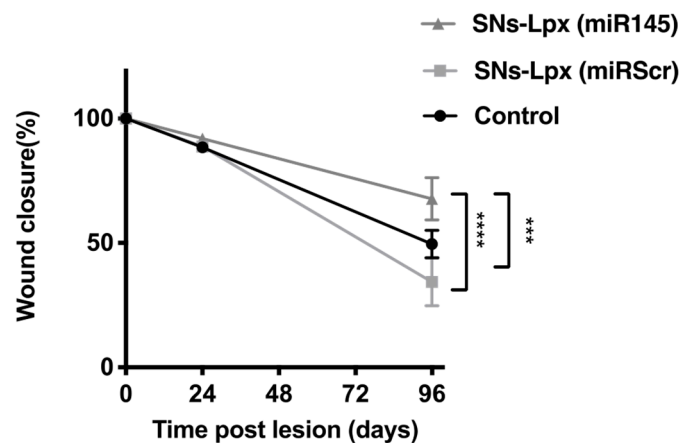

**Figure S6.** Normalized wound closure (%) after treatment of SW480 cells with SNs-Lpx (miR145), control, and the formulation with the scrambled sequence (SNs-Lpx (miRScr)).
